1 Assessment of urinary pharmacodynamic profiles of faropenem against  
2 extended-spectrum  $\beta$ -lactamase-producing *Escherichia coli* with canine *ex*  
3 *vivo* modeling

4

5 Short title: Urinary pharmacodynamics of faropenem against ESBL-producing *E. coli* by canine  
6 *ex vivo* model

7

8 Kazuki Harada,<sup>1,2,\*</sup> Takae Shimizu,<sup>1,2</sup> Naoki Miyashita,<sup>2</sup> and Yoshiaki Hikasa<sup>1,2</sup>

9

10 <sup>1</sup>The United Graduate School of Veterinary Science, Yamaguchi University, 1677-1 Yoshida,  
11 Yamaguchi 753-8511, Japan

12 <sup>2</sup>Joint Department of Veterinary Medicine, Tottori University, Minami 4-101, Koyama-Cho,  
13 Tottori 680-8553, Japan

14

15 \*Corresponding author

16 Tel: +81-857-31-5432, Fax: +81-857-31-5432

17 *E-mail address:* [k-harada@muses.tottori-u.ac.jp](mailto:k-harada@muses.tottori-u.ac.jp)

## 19 **Abstract**

20 Extended-spectrum  $\beta$ -lactamase (ESBL)-producing bacteria are of great concern in companion  
21 animals with urinary tract infections (UTIs). Because of its high safety and stability in the  
22 presence of ESBLs, faropenem is assumed to be a candidate antimicrobial agent for canine UTIs  
23 with ESBL-producing bacteria. This study was performed to investigate the urinary  
24 pharmacokinetics and pharmacodynamics of faropenem administered at 5 mg/kg body weight in  
25 six healthy dogs using an *ex vivo* model. Six UTI pathogenic strains of ESBL-producing  
26 *Escherichia coli* (ESBL-EC) with the following faropenem minimum inhibitory concentrations  
27 (MICs) were used: 1  $\mu\text{g}/\text{mL}$  ( $n = 2$ ), 2  $\mu\text{g}/\text{mL}$  ( $n = 2$ ), 4  $\mu\text{g}/\text{mL}$  ( $n = 1$ ), and 16  $\mu\text{g}/\text{mL}$  ( $n = 1$ ).  
28 Urine samples were obtained every 4 h for the first 12 h after faropenem administration for  
29 measurement of the urine drug concentration and urinary bactericidal titers (UBTs). The urine  
30 concentration of faropenem peaked at 0 to 4 h after administration, with a mean maximum  
31 concentration of 584  $\mu\text{g}/\text{mL}$ , and markedly decreased at 8 to 12 h (23  $\mu\text{g}/\text{mL}$ ). The median  
32 UBTs for all tested ESBL-EC strains were highest at 0 to 4 h and then significantly decreased at  
33 8 to 12 h. These findings indicate that administration of faropenem more than once daily is  
34 recommended for the treatment of ESBL-EC-related UTIs in dogs. In addition, the median areas  
35 under the UBT–time curves (AUBTs) were significantly inversely correlated with the  
36 corresponding MICs for faropenem in the tested strains ( $P < 0.05$ ). Notably, the median AUBTs  
37 were significantly higher in ESBL-EC strains with an MIC of 1  $\mu\text{g}/\text{mL}$  than in those with an  
38 MIC of  $\geq 4$   $\mu\text{g}/\text{mL}$  ( $P < 0.05$ ). The present study serves as the basis of clinical application of  
39 faropenem for ESBL-producing bacteria-related UTIs in dogs.

## 41 **Introduction**

42 Urinary tract infections (UTIs) are common bacterial infections in dogs, occurring in  
43 approximately 14% of dogs in their lifetimes with a variable age at onset [1]. *Escherichia coli* is  
44 the most common infectious bacteria, although various gram-negative and gram-positive  
45 bacteria can cause UTIs in dogs [2,3].

46 The prevalence of extended-spectrum  $\beta$ -lactamase (ESBL)-producing bacteria is of great  
47 concern worldwide in companion animals with UTIs [4,5]. Although ESBLs are usually  
48 involved in resistance to oxyimino-cephalosporins, penicillins, and narrow-spectrum  
49 cephalosporins, ESBL-producing bacteria are often resistant to other classes of antimicrobials  
50 [6]. These multidrug-resistant phenotypes of ESBL-producing bacteria have major implications  
51 in the selection of adequate empirical therapy regimens [6].

52 We previously reported high *in vitro* efficacy of several antimicrobials against ESBL-  
53 producing *E. coli* (ESBL-EC) isolates from companion animals [7]. Of these antimicrobials,  
54 faropenem is representative of the penem class and exhibits stability to hydrolysis by ESBLs  
55 [8,9]; additionally, it is highly safe in dogs [10,11]. These findings indicate that faropenem may  
56 be a promising candidate antimicrobial for canine UTIs with ESBL-producing bacteria.  
57 However, the urinary pharmacokinetic/pharmacodynamic profile, which is essential for  
58 assessment of treatment efficacy of antimicrobials in UTIs [12-14], remains to be investigated.

59 In the present study, we used liquid chromatography–mass spectrometry (LC-MS) to  
60 investigate the urinary pharmacokinetics of faropenem in dogs. We also measured urinary  
61 bactericidal titers (UBTs) and related parameters of faropenem against ESBL-EC strains from  
62 canine UTIs.

63

## 64 **Materials and Methods**

## 65 **Sampling of urine from dogs treated with faropenem**

66 The herein-described animal experiments were conducted under an ethics committee-approved  
67 protocol in accordance with the Tottori University Animal Use Committee (approval number:  
68 15-T-46) and carried out as described previously [14]. Six beagle dogs (4 male, 2 female; mean  
69 age and weight,  $6.3 \pm 3.7$  years and  $12.4 \pm 1.18$  kg, respectively) were purchased from  
70 Kitayama Labes Co., Ltd. (Nagano, Japan). Prior to this study, all dogs were confirmed to be  
71 clinically healthy based on a physical examination, complete blood count, biochemical blood  
72 test and urinalysis. A balloon catheter was placed in the urinary bladder of each dog to allow  
73 urine collection. The dogs were orally administered faropenem (Farom Dry Syrup for  
74 Pediatric<sup>®</sup>; Maruho Co., Ltd., Osaka, Japan) at a dose of 5 mg/kg body weight. Whole urine was  
75 obtained via the catheter at 4, 8, and 12 h after administration. The samples were sterilized by  
76 filtration and stored at  $-80^{\circ}\text{C}$  until analysis.

## 77 **Measurement of urine faropenem concentration with LC-MS**

78 Reference standard faropenem and cephalexin as the internal standard were separately dissolved  
79 in acetonitrile and then diluted with ultrapure water. LC-MS was carried out with a high-  
80 performance liquid chromatograph (LC-10AT; Shimadzu Co., Ltd., Kyoto, Japan). The mass  
81 spectrums of faropenem and cephalexin were represented by peaks at  $m/z$  308.0553-308.0558  
82 and  $m/z$  352.10, respectively. The compounds were separated on a 2.1-mm internal diameter  $\times$   
83 100-mm length, 3- $\mu\text{m}$  analytical column operated at  $40^{\circ}\text{C}$  (Mastro C18; Shimadzu GLC Ltd.,  
84 Tokyo, Japan). The mobile phase comprised 0.1% formic acid aqueous solution and acetonitrile,  
85 and the flow rate was 0.2 mL/min. The injection volume was 0.1  $\mu\text{L}$ . Standard samples for  
86 creation of a calibration curve were prepared with blank urine matrix spiked with six  
87 concentrations of faropenem (1, 5, 10, 50, 100, and 500  $\mu\text{g/mL}$ ). Standard and dog urine

88 samples (50  $\mu$ L) were mixed with 100  $\mu$ g/mL of cephalexin (50  $\mu$ L) as the internal standard and  
89 methanol (400  $\mu$ L). After centrifugation at 12,000 rpm for 5 min, the supernatants were  
90 harvested and then diluted 10-fold with ultrapure water for analysis. The validity of the LS-MS  
91 assay was verified according to the guideline provided by the US Food and Drug  
92 Administration [15].

### 93 **Test organisms**

94 The six ESBL-EC strains (strains ES-EC1–ES-EC6) from dogs with UTIs were selected from  
95 our collection [7] and used in this study. The faropenem minimum inhibitory concentrations  
96 (MICs) of these strains were determined in our previous study [7]. According to the tentative  
97 breakpoint set by Fuchs et al. [16], the six strains were categorized as follows: strains ES-EC1  
98 to ES-EC4, susceptible; strain ES-EC5, intermediately susceptible; and strain ES-EC6, resistant  
99 (Table 1).

100

101 **Table 1. MIC, MBC, and MUBC of faropenem for the six ESBL-producing *E. coli* strains**  
102 **tested in this study**

| Strain | MIC <sup>a</sup><br>( $\mu$ g/mL) | MBC<br>( $\mu$ g/mL) | MUBC ( $\mu$ g/mL) |              | MUBC/MBC |
|--------|-----------------------------------|----------------------|--------------------|--------------|----------|
|        |                                   |                      | Median             | Range        |          |
| ES-EC1 | 1 (S)                             | 2                    | 1.29               | (0.64-3.57)  | 0.64     |
| ES-EC2 | 1 (S)                             | 1                    | 0.98               | (0.12-10.46) | 0.98     |
| ES-EC3 | 2 (S)                             | 4                    | 4.68               | (1.0-14.7)   | 1.17     |
| ES-EC4 | 2 (S)                             | 2                    | 1.81               | (0.66-4.16)  | 0.91     |
| ES-EC5 | 4 (I)                             | 4                    | 14.5               | (3.1-20.9)   | 3.62     |
| ES-EC6 | 16 (R)                            | 16                   | 11.94              | (5.56-28.57) | 0.75     |

103 <sup>a</sup>S, susceptible; I, intermediate; and R, resistant according to Fuchs et al. [16].

104 MIC, minimum inhibitory concentration; MBC, minimum bactericidal concentration; MUBC,

105 minimum urinary bactericidal concentration; ESBL, extended-spectrum  $\beta$ -lactamase

## 106 **Determination of minimum bactericidal concentration**

107 The minimum bactericidal concentration (MBC) was defined as the minimum concentration of  
108 drug needed to kill  $\geq 99.9\%$  of viable organisms after incubation for 24 h, according to the  
109 Clinical and Laboratory Standards Institute guideline [17].

## 110 **Determination of urinary bactericidal titer, area under the** 111 **UBT–time curve, and minimum urinary bactericidal** 112 **concentration**

113 The urinary bactericidal titers (UBTs) corresponded to the maximal dilution titer of urine  
114 allowing bactericidal activity and were determined as described previously [14,18]. A  
115 logarithmic serial two-fold dilution was prepared using a 1:1 mixture of the urine sample  
116 obtained every 4 h after administration (see section titled “Sampling of urine from dogs treated  
117 with faropenem”) and the individual dog’s antimicrobial-free urine obtained prior to drug  
118 administration. UBTs were determined using a microdilution test system. Each well of the  
119 microplates contained 100  $\mu\text{L}$  of the prepared dilution. The final inoculum was about  $5 \times 10^5$   
120 CFU/mL. The plates were incubated at 35°C for 18 h, and the subcultured urine was then  
121 transferred to antimicrobial-free agar. The plates were incubated at 35°C overnight. The number  
122 of colonies subsequently grown was used to determine the bactericidal endpoint. The UBT was  
123 defined as a  $\geq 99.9\%$  reduction of the initially inoculated colony counts. A UBT of 0 was  
124 defined as no bactericidal activity, and a UBT of 1 was assigned when only undiluted urine  
125 displayed bactericidal activity. UBTs were transformed into ordinal data and described with  
126 reciprocal numbers [13,14].

127 The area under the UBT–time curve (AUBT) was calculated as the sum of the products of  
128 the reciprocal UBT values and the respective time (h) intervals for each test organism to easily

129 compare UBT data among the tested strains. Calculation of the AUBT is an approximation  
130 considering the 4-h time intervals and the nonlinear kinetics in urine [13,14].

131 The minimum urinary bactericidal concentration (MUBC) for each strain was determined  
132 by dividing the antimicrobial concentration in a urine sample by the corresponding UBT  
133 [14,18].

## 134 **Statistical analysis**

135 Repeated analysis of variance with Bonferroni correction was used to compare urine  
136 concentrations between collecting time periods. The median values of UBT, AUBT, and MUBC  
137 among the six dogs were calculated from the average value of the two middle elements. The  
138 UBTs for each strain were compared between collecting time periods by Friedman's test  
139 followed by Scheffe's test. The AUBTs were compared among the six tested strains by the  
140 Tukey–Kramer test. Spearman's rank correlation coefficient ( $\rho$ ) was calculated between the  
141 MIC and median AUBT. A *P*-value of <0.05 was considered significant for all analyses.

142

## 143 **Results**

### 144 **Safety and laboratory test results**

145 No adverse effects were observed in any dogs during the test period. The results of the physical  
146 examination, complete blood count, and biochemical blood test displayed no clinically relevant  
147 changes.

### 148 **Urine concentration and urinary excretion**

149 The LC-MS assay showed a lower limit of quantitation at 10 ng/mL for faropenem in dog urine.  
150 The urine volume, urinary concentration, and cumulative excretion are shown in Table 2. The  
151 mean urinary concentration peaked 0 to 4 h after administration (584  $\mu\text{g/mL}$ ), then decreased to

152 246 µg/mL at 4 to 8 h and 23 µg/mL at 8 to 12 h. A significant difference in the urine  
153 concentration was observed between 0 to 4 h and 8 to 12 h ( $P < 0.05$ ). All urine samples  
154 collected prior to drug administration had no detectable drug. The mean urinary excretion was  
155 25.3% at 0 to 4 h and then remained almost unchanged from 4 to 8 h (34.3%) to 8 to 12 h  
156 (35.5%).

157

158 **Table 2. Urinary volume, concentration, and cumulative excretion of faropenem in six**  
159 **dogs**

| Collection period (h) | Vol (ml)   | Conc (µg/mL)   | Cumulative urinary excretion (%) |
|-----------------------|------------|----------------|----------------------------------|
| 0-4                   | 44 (13-78) | 584 (147-1748) | 25.3 (11.9-48.3)                 |
| 4-8                   | 28 (13-50) | 246 (64-669)   | 34.3 (19.1-66.9)                 |
| 8-12                  | 32 (13-67) | 23 (LLQ-35)    | 35.5 (19.1-67.3)                 |

160 Data are presented as mean (range).

161 Vol, volume; Conc, concentration; LLQ, lower level of quantification.

162

## 163 **UBTs and AUBTs**

164 The temporal changes in the median UBTs for each strain are shown in Figure 1. In all tested  
165 ESBL-EC strains, the median UBTs of faropenem peaked at 0 to 4 h and then significantly  
166 decreased at 4 to 8 h and/or 8 to 12 h ( $P < 0.05$ ).

167

168 **Fig. 1. Reciprocal UBTs of faropenem (5 mg/kg body weight) for the six ESBL-producing**  
169 ***Escherichia coli* strains tested in this study.** UBT, urinary bactericidal titer; ESBL, extended-  
170 spectrum β-lactamase; MIC, minimum inhibitory concentration.

171

172 Of the tested strains, the two strains with an MIC of 1 µg/mL (ES-EC1 and ES-EC2) had



173 significantly higher median AUBTs (1072–1312) than the strains with an MIC of 4 µg/mL (ES-  
174 EC5) and 16 µg/mL (ES-EC6) ( $P < 0.05$ ) (Fig. 2).

175

176 **Fig. 2. Comparison of AUBTs of faropenem between the six ESBL-producing *Escherichia***

177 ***coli* strains tested in this study.** AUBT, area under the urinary bactericidal titer–time curve;

178 ESBL, extended-spectrum β-lactamase; MIC, minimum inhibitory concentration.

179 \*Significant differences between groups ( $P < 0.05$ ).

180

181 Spearman’s rank correlation coefficient between the MICs and median AUBTs was  $-0.968$

182 ( $P < 0.05$ ).

### 183 **MBCs and MUBCs**

184 The MBCs ranged from 1 to 16 µg/mL (one to two times the corresponding MIC for each

185 strain), whereas the median MUBCs ranged from 0.98 to 11.94 µg/mL (Table 1). The ratios of

186 the median MUBC to the corresponding MBC ranged from 0.64 to 3.62.

187

## 188 **Discussion**

189 Although faropenem shows excellent *in vitro* antimicrobial activity against ESBL-producing

190 bacteria [7], its efficacy for canine UTIs with these bacteria has not been previously assessed.

191 To our knowledge, this is the first report to investigate the urinary pharmacokinetics and

192 pharmacodynamics of faropenem in dogs.

193 The present study demonstrated that in dogs, approximately one-third of the dose of

194 faropenem is excreted in urine 12 h after oral administration. This urinary excretion of

195 faropenem in dogs is higher than that in humans: urinary excretion of the drug after oral

196 administration at a 300-mg dose in human patients was merely 14% to 20% [9]. These findings

197 imply that this drug is more suitable for treatment of UTIs in dogs than in humans, possibly  
198 because of the differences in absorption, distribution, metabolism, and elimination between  
199 dogs and humans.

200 In this study, we also found an extremely low concentration of faropenem in dog urine at  
201 8 to 12 h, and the cumulative excretion remained almost unchanged from 4 to 8 h to 8 to 12 h.  
202 This indicates that urinary excretion of faropenem practically expires at 12 h after oral  
203 administration in dogs. This urinary pharmacokinetic property of faropenem differs greatly from  
204 that of once-a-day fluoroquinolones, which can maintain high urinary concentrations until 24 h  
205 after oral administration [14,19,20]. In addition, the UBTs, which can serve as a  
206 pharmacokinetic/pharmacodynamic assessment parameter of antimicrobial agents in the urine  
207 [13,14], of faropenem in all tested strains fluctuated closely with the urine concentration of the  
208 drug during the same period; notably, the UBTs significantly decreased 8 to 12 h after oral  
209 administration. Our results may indicate that administration of faropenem two or three times a  
210 day is more appropriate than once a day for the treatment of canine UTIs.

211 When comparing UBTs among the six ESBL-producing *E. coli* strains tested in this  
212 study, the strains with the lower MICs generally exhibited the higher UBTs of faropenem during  
213 the test periods. A similar finding was confirmed in our previous study on the UBTs of  
214 orbifloxacin [14]. Additionally, the AUBTs, which reflect the overall UBTs, were greatly  
215 dependent upon the respective MIC of each strain. Notably, the AUBTs of the two strains with a  
216 faropenem MIC of 1 µg/mL, which is the minimum concentration required to inhibit 90% of  
217 ESBL-producing *E. coli* [7], were extremely high. This implies that most ESBL-EC-related  
218 UTIs in dogs can be theoretically treated with faropenem at an oral dose of 5 mg/kg body  
219 weight. Compared with the two susceptible strains with an MIC of 1 µg/mL, the strains with an  
220 MIC of 4 and 16 µg/mL had significantly lower AUBTs (approximately 1/10 of those of the  
221 susceptible strains), suggesting that treatment with faropenem at the same dose has less  
222 therapeutic efficacy for UTIs by *E. coli* strains with an MIC of  $\geq 4$  µg/mL. Fuchs et al. [16]

223 proposed that the susceptibility breakpoint of faropenem is  $\leq 2$   $\mu\text{g/mL}$  based on human  
224 pharmacokinetic parameters. The present findings suggest that this breakpoint is also reasonable  
225 for canine UTIs when treated with faropenem at a dose of 5 mg/kg. Further clinical studies are  
226 needed to establish this value as the valid clinical breakpoint.

227 Like the study by Matsuzaki et al. [21], our data showed a low MBC/MIC ratio (within one  
228 dilution), indicating that faropenem has *in vitro* bactericidal activity against ESBL-EC. In the  
229 present study, we calculated the MUBCs in each test strain based on the urine concentration and  
230 UBTs to assess the activity of faropenem in dog urine. As a result, the median MUBCs were  
231 0.6- to 3.6-fold higher than the corresponding MBCs. This MUBC/MBC ratio was relatively  
232 low compared with orbifloxacin, for which the MUBC/MBC ranged from approximately 2 to 15  
233 [14]. Comparatively, therefore, the antimicrobial activity of faropenem might be minimally  
234 decreased in dog urine.

## 235 **Conclusion**

236 We determined the UBTs and related parameters of faropenem in dogs to assess the efficacy of  
237 this drug against canine UTIs with ESBL-producing bacteria. Based on the urinary  
238 pharmacokinetics and UBTs of faropenem, administration more than once daily is  
239 recommended for treatment of these UTIs in dogs. In addition, the comparison of AUBTs  
240 among the strains with different MICs might suggest that an MIC of  $\leq 2$   $\mu\text{g/mL}$  is applicable to  
241 the susceptible breakpoint of faropenem for canine UTIs when administered at 5 mg/kg body  
242 weight. We strongly believe that the present study serves as a basis for clinical application of  
243 faropenem for ESBL-producing bacteria-related UTIs in dogs.

## 244 **Competing interests**

245 K.H. received JPSP KAKENHI Grant Number 16K18804 (Japan Society for the Promotion of  
246 Science; <https://www.jsps.go.jp/j-grantsinaid/>). The funder had no role in the study design, data

247 collection and analysis, decision to publish, or preparation of the manuscript.

## 248 **Acknowledgments**

249 We thank Ms. Mizuki Yokono for providing technical advice concerning LC-MS and Dr. Taku

250 Tsukamoto for providing the analytical column for LC-MS. We also thank Angela Morben,

251 DVM, ELS, from Edanz Group ([www.edanzediting.com/ac](http://www.edanzediting.com/ac)), for editing a draft of this

252 manuscript.

## 254 **References**

- 255 1. Thompson MF, Litster AL, Platell JL, Trott DJ. Canine bacterial urinary tract infections: new  
256 developments in old pathogens. *Vet J* 2011;190:22-27.
- 257 2. Ling GV, Norris CR, Franti CE, Eisele PH, Johnson DL *et al.* Interrelations of organism  
258 prevalence, specimen collection method, and host age, sex, and breed among 8,354 canine  
259 urinary tract infections (1969-1995). *J Vet Intern Med* 2001;15:341-347.
- 260 3. Smee N, Loyd K, Grauer G. UTIs in small animal patients: part 1: etiology and pathogenesis.  
261 *J Am Anim Hosp Assoc* 2013;49:1-7.
- 262 4. Ewers C, Grobbel M, Stamm I, Kopp PA, Diehl I, Semmler T, et al. Emergence of human  
263 pandemic O25:H4-ST131 CTX-M-15 extended-spectrum-beta-lactamase- producing  
264 *Escherichia coli* among companion animals. *J Antimicrob Chemother.* 2010; 65: 651-660.
- 265 5. Marques C, Belas A, Franco A, Aboim C, Gama LT, Pomba C. Increase in antimicrobial  
266 resistance and emergence of major international high-risk clonal lineages in dogs and cats  
267 with urinary tract infection: 16 year retrospective study. *J Antimicrob Chemother.* 2018; 73:  
268 377-384.
- 269 6. Pitout JD, Laupland KB. Extended-spectrum  $\beta$ -lactamase-producing *Enterobacteriaceae*: an  
270 emerging public health concern. *Lancet Infect Dis.* 2008; 8: 159-166.
- 271 7. Shimizu T, Harada K, Tsuyuki Y, Kimura Y, Miyamoto T, Hatoya S, et al. *In vitro* efficacy  
272 of 16 antimicrobial drugs against a large collection of  $\beta$ -lactamase-producing isolates of  
273 extraintestinal pathogenic *Escherichia coli* from dogs and cats. *J Med Microbiol.* 2017; 66:  
274 1085-1091.
- 275 8. Dalhoff A, Nasu T, Okamoto K. Beta-lactamase stability of faropenem. *Chemotherapy* 2003;  
276 49: 229-236.
- 277 9. Hamilton-Miller J. Chemical and microbiologic aspects of penems, a distinct class of beta-

- 278 lactams: focus on faropenem. *Pharmacotherapy* 2003; 23: 1497-1507.
- 279 **10.** Okamoto M, Ochiai T, Ichiki T. The effects on kidneys of dogs after a single or repeated  
280 dosing of faropenem sodium. *Jpn Pharmacol Ther.* 1998; 26: 13-21.
- 281 **11.** Fagi AS, Lanphear C, Gill S, Colagiovanni DB. Juvenile toxicity study of faropenem  
282 medoxomil in beagle puppies. *Reprod Toxicol.* 2010; 30: 619-624.
- 283 **12.** Wagenlehner FM, Naber KG. Antibiotic treatment for urinary tract infections:  
284 pharmacokinetic/pharmacodynamic principles. *Expert Rev Anti infect Ther.* 2004; 2: 923-  
285 931.
- 286 **13.** Wagenlehner FM, Wagenlehner C, Redman R, Weidner W, Naber KG. Urinary  
287 bactericidal activity of doripenem versus that of levofloxacin in patients with complicated  
288 urinary tract infections or pyelonephritis. *Antimicrob Agents Chemother.* 2009; 53: 1567-  
289 1573.
- 290 **14.** Shimizu T, Harada K, Manabe S, Tsukamoto T, Ito N, Hikasa Y. Assessment of urinary  
291 pharmacokinetics and pharmacodynamics of orbifloxacin in healthy dogs with *ex vivo*  
292 modeling. *J Med Microbiol.* 2017; 66: 616-621.
- 293 **15.** Food and Drug Administration. Guidance for Industry, Bioanalytical Method Validation.  
294 2001. URL:  
295 [http://www.fda.gov/downloads/Drugs/Guidance/ucm070107.pdf#search=%27Bioanalytical+](http://www.fda.gov/downloads/Drugs/Guidance/ucm070107.pdf#search=%27Bioanalytical+Method+Validation%2C+Center+for+Drug+Evaluation+and+Research.%27)  
296 [Method+Validation%2C+Center+for+Drug+Evaluation+and+Research.%27](http://www.fda.gov/downloads/Drugs/Guidance/ucm070107.pdf#search=%27Bioanalytical+Method+Validation%2C+Center+for+Drug+Evaluation+and+Research.%27). Accessed on  
297 Jan. 15, 2016.
- 298 **16.** Fuchs PC, Barry AL, Sewell DL. Antibacterial activity of WY-49605 compared with those  
299 of six other oral agents and selection of disk content for disk diffusion susceptibility testing.  
300 *Antimicrob Agents Chemother.* 1995; 39: 1472-1479.
- 301 **17.** Clinical and Laboratory Standards Institute. Method for Determining Bactericidal Activity

- 302 of Antimicrobial Agents; Approved Guideline. CLSI document M26-A. Wayne, PA; 1999.
- 303 **18.** Well M, Naber KG, Kinzig-Schippers M, Sörgel F. Urinary bactericidal activity and  
304 pharmacokinetics of enoxacin versus norfloxacin and ciprofloxacin in healthy volunteers  
305 after a single oral dose. *Int J Antimicrob Agents* 1998; 10: 31-38.
- 306 **19.** Monlouis JD, De Jong A, Limet A, Richez P. Plasma pharmacokinetics and urine  
307 concentrations of enrofloxacin after oral administration of enrofloxacin in dogs. *J Vet*  
308 *Pharmacol Ther.* 1997; 20 (Suppl 1): 61-63.
- 309 **20.** Daniels JB, Tracy G, Irom SJ, Lakritz J. Fluoroquinolone levels in healthy dog urine  
310 following a 20-mg/kg oral dose of enrofloxacin exceed mutant prevention concentration  
311 targets against *Escherichia coli* isolated from canine urinary tract infections. *J Vet Pharmacol*  
312 *Ther.* 2014; 37: 201-204.
- 313 **21.** Matsuzaki K, Nishiyama T, Hasegawa M, Kobayashi I, Kaneko A, Sasaki J. In vitro  
314 bactericidal activities of new oral penem, faropenem against the various clinical isolates. *Jpn*  
315 *J Antibiot.* 1999; 52: 431-438.

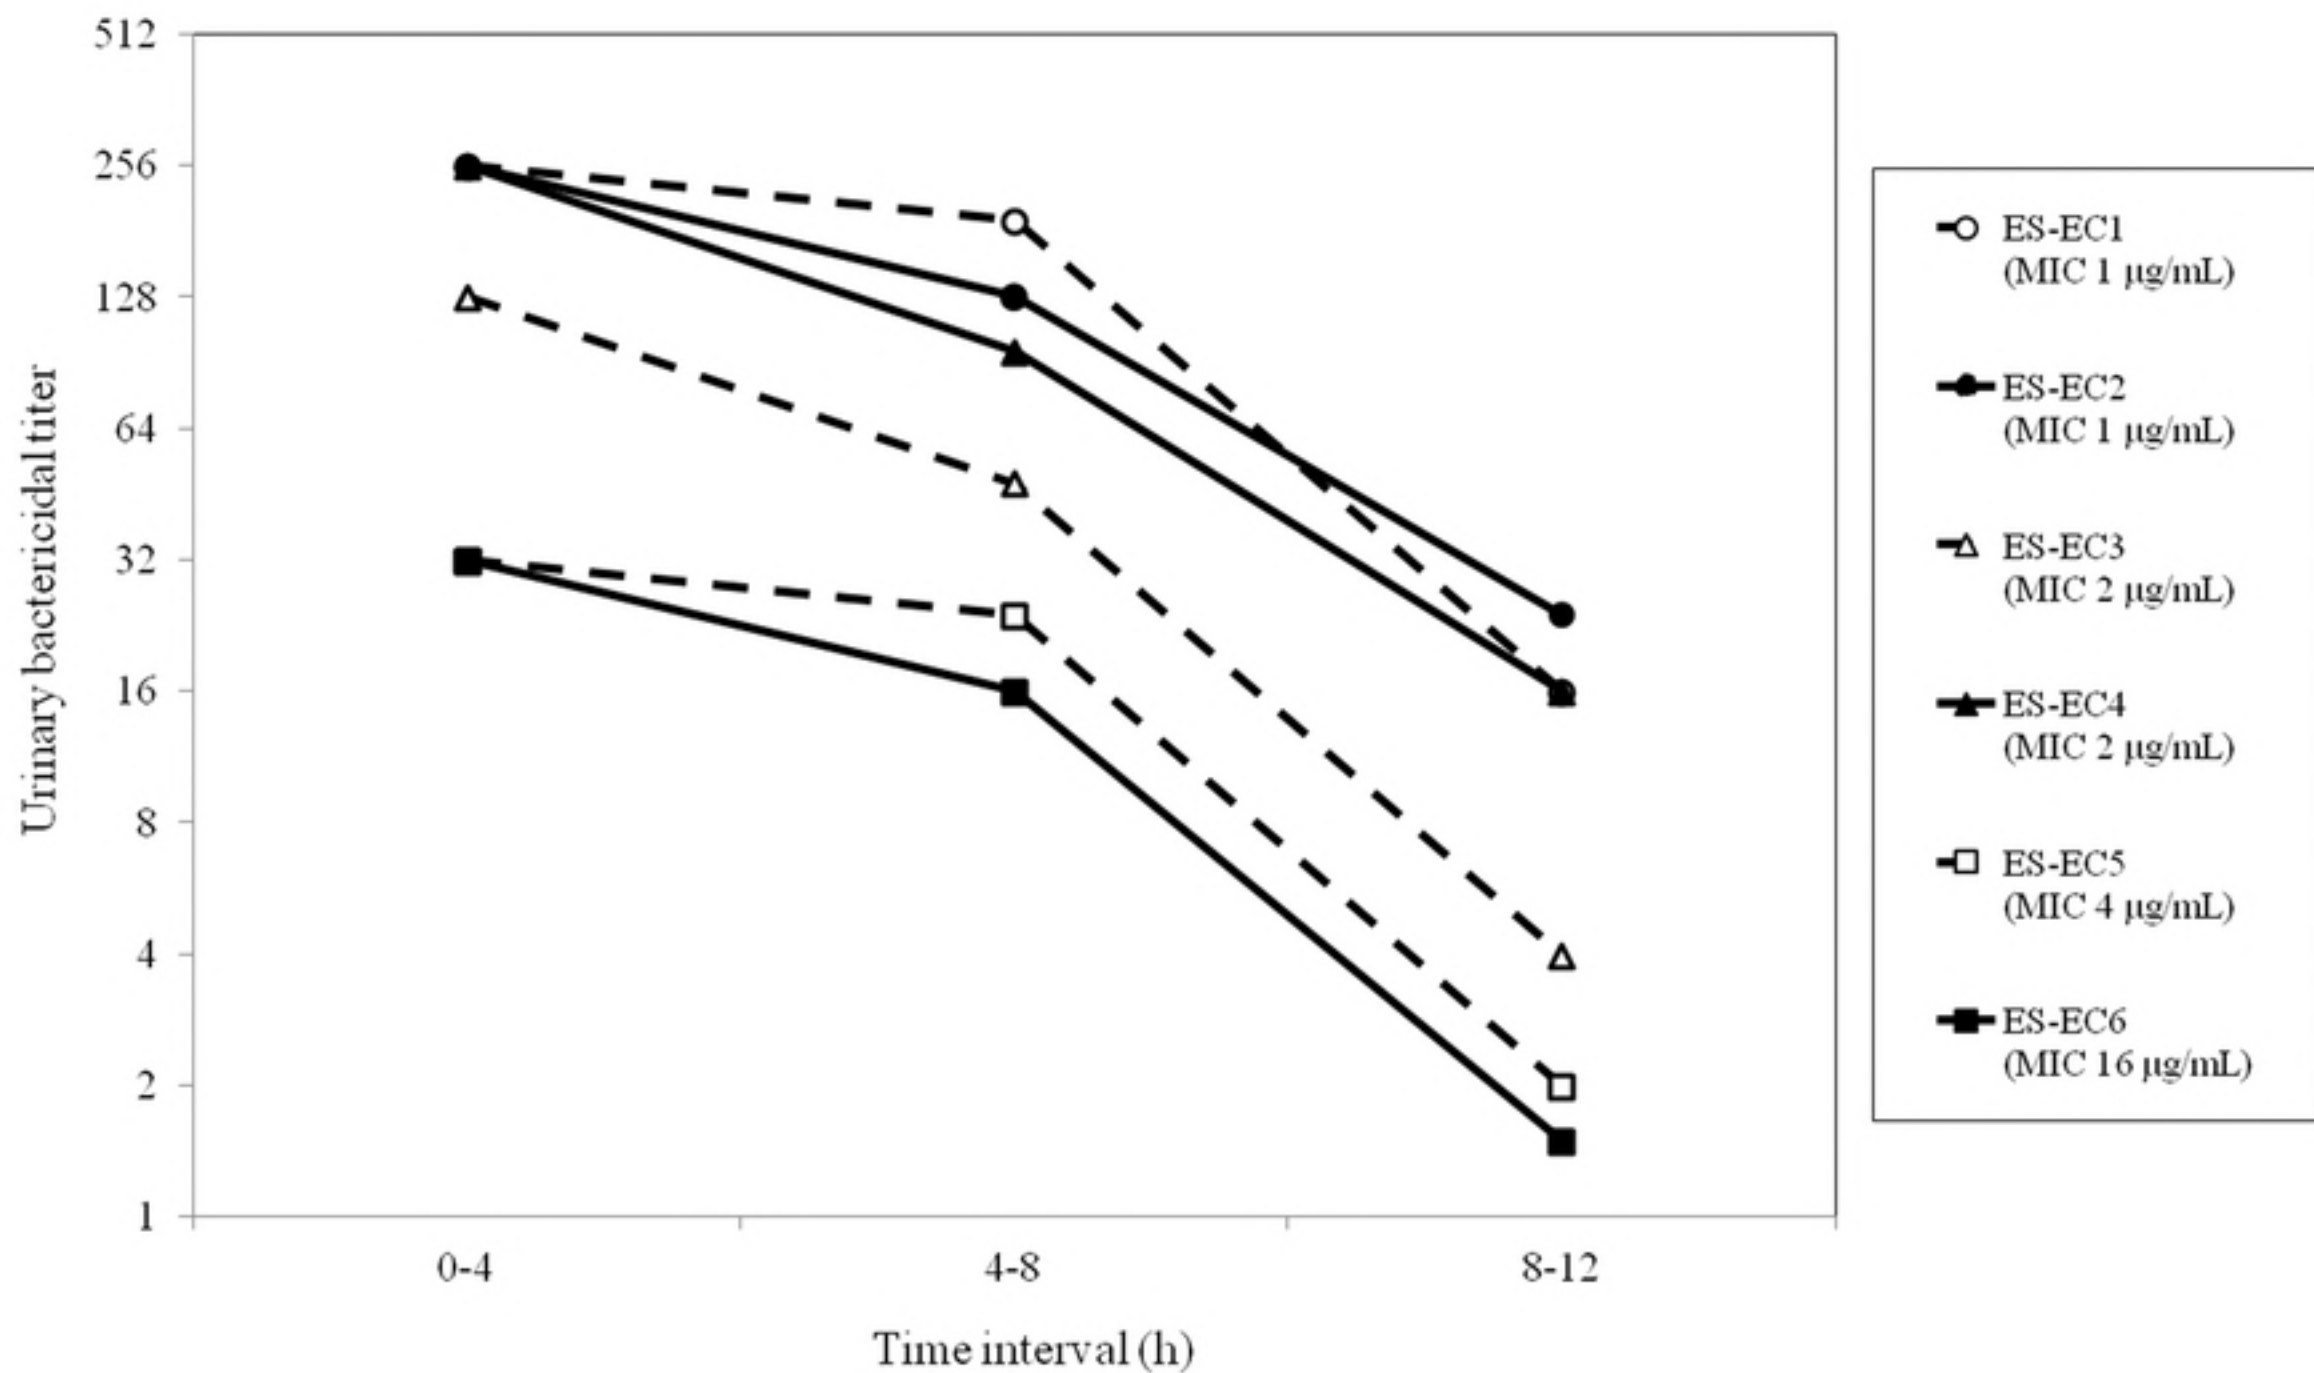



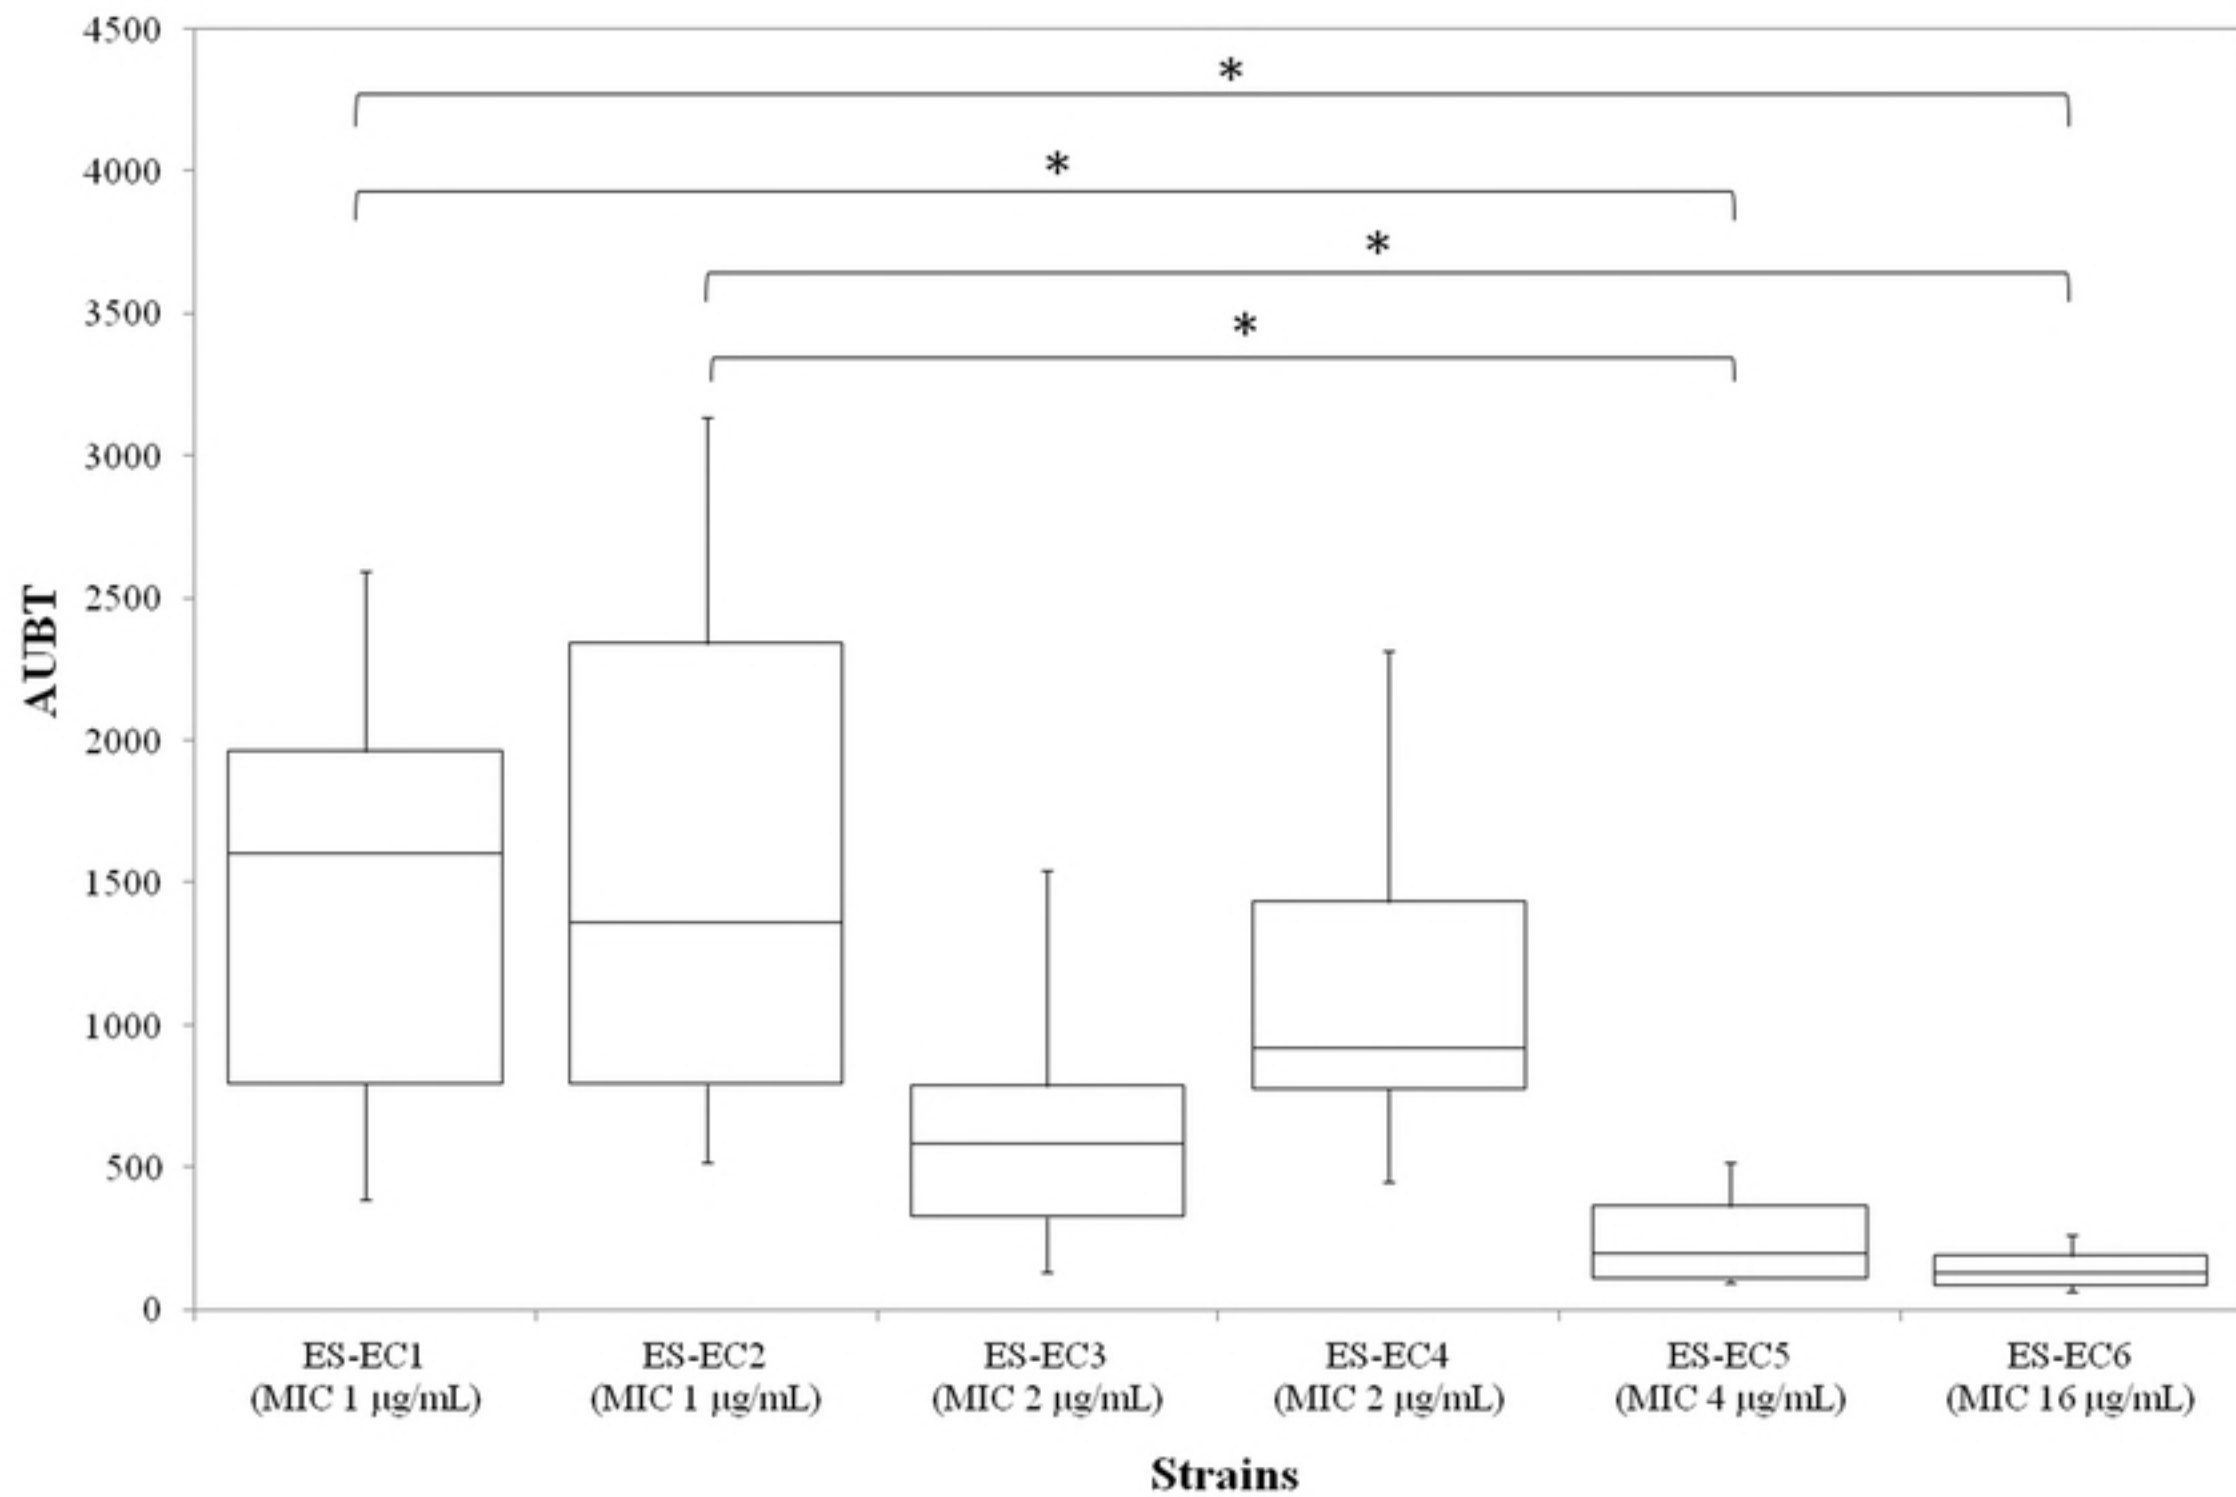

Source: https://www.biorxiv.org/content/10.1101/321836v1.full.pdf
